# Supplementary material for: Isotopically labeled sulfur compounds and synthetic selenium and tellurium analogues to study sulfur metabolism in marine bacteria
Source: publisher site journal article supplement (doi:10.3762/bjoc.9.108), 2013-05-15
Supplement: Additional file 1 [file 1860-5397-9-108-S1.pdf]

# Supporting Information

for

## **Isotopically labeled sulfur compounds and synthetic selenium and tellurium analogues to study sulfur metabolism in marine bacteria**

Nelson L. Brock<sup>1</sup>, Christian A. Citron<sup>1</sup>, Claudia Zell<sup>1,2</sup>, Martine Berger<sup>2</sup>, Irene Wagner-Döbler<sup>3</sup>, Jörn Petersen<sup>4</sup>, Thorsten Brinkhoff<sup>2</sup>, Meinhard Simon<sup>2</sup>, and Jeroen S. Dickschat<sup>1\*</sup>

Address: <sup>1</sup>Institute of Organic Chemistry, TU Braunschweig, Hagenring 30, 38106 Braunschweig, Germany, <sup>2</sup>Institute for Chemistry and Biology of the Marine Environment (ICBM), University of Oldenburg, Carl-von-Ossietzky-Str. 9–11, 26129 Oldenburg, Germany, and <sup>3</sup>Helmholtz Center for Infection Research, Inhoffenstraße 7, 38124 Braunschweig, Germany and <sup>4</sup>Leibniz-Institut DSMZ - Deutsche Sammlung von Mikroorganismen und Zellkulturen GmbH, Inhoffenstraße 7b, 38124 Braunschweig, Germany.

Email: Jeroen Sidney Dickschat – [j.dickschat@tu-bs.de](mailto:j.dickschat@tu-bs.de)

\* Corresponding author

### **Tables with strains, primers and the full results of the headspace analyses**

**Table S1:** Wild type and mutant strains investigated in this study.

| Strain                             | Genotype                  | Locus Tag <sup>a</sup> | Source    |
|------------------------------------|---------------------------|------------------------|-----------|
| <i>Phaeobacter gallaeciensis</i>   |                           |                        |           |
| DSM 17395                          | wild type                 |                        | [1]       |
| CZ01                               | <i>dmdA::kan</i>          | PGA1_262p01830         | This work |
| WP45                               | <i>cysI::EZTn5</i>        | PGA1_c20760            | [1]       |
| WP73                               | <i>sat/cysC::EZTn5</i>    | PGA1_c24800            | [1]       |
| 262 kb mutant                      | DSM 17395 $\Delta$ 262 kb |                        | [2]       |
| <i>Ruegeria pomeroyi</i>           |                           |                        |           |
| DSS-3 (= DSM 15171 <sup>T</sup> )  | wild type                 |                        | [3]       |
| J471                               | <i>dmdA::pBIO1870</i>     | SPO1913                | [4]       |
| J474                               | <i>dddQ::pBIO1869</i>     | SPO1596                | [5]       |
| <i>Roseobacter denitrificans</i>   |                           |                        |           |
| OCh 114 (= DSM 7001 <sup>T</sup> ) | wild type                 |                        | [6]       |
| <i>Oceanibulbus indolifex</i>      |                           |                        |           |
| HEL-45 (= DSM 14862 <sup>T</sup> ) | wild type                 |                        | [7]       |
| <i>Dinoroseobacter shibae</i>      |                           |                        |           |
| DFL-12 (= DSM 16493 <sup>T</sup> ) | wild type                 |                        | [8]       |
| <i>Labrenzia alexandrii</i>        |                           |                        |           |
| DFL-11 (= DSM 17067 <sup>T</sup> ) | wild type                 |                        | [9]       |
| <i>Hoeflea phototrophica</i>       |                           |                        |           |
| DFL-43 (= DSM 17068 <sup>T</sup> ) | wild type                 |                        | [10]      |
| <i>Roseovarius mucosus</i>         |                           |                        |           |
| DFL-24 (= DSM 17069 <sup>T</sup> ) | wild type                 |                        | [11]      |

<sup>a</sup> Locus tags of the targeted genes.

**Table S2:** Oligonucleotide primers used in this study.

| Primer  | Sequence                 |
|---------|--------------------------|
| Cl1f    | ATTGGA ACTGGCAAGTGCGGC   |
| Cl1r    | AACTTCCATCGTGACTATGTCAGC |
| nptII-f | CCTTTAGTGAGGGTTAATTGCGC  |
| nptII-r | GGATGAATGTCAGCTACTGG     |

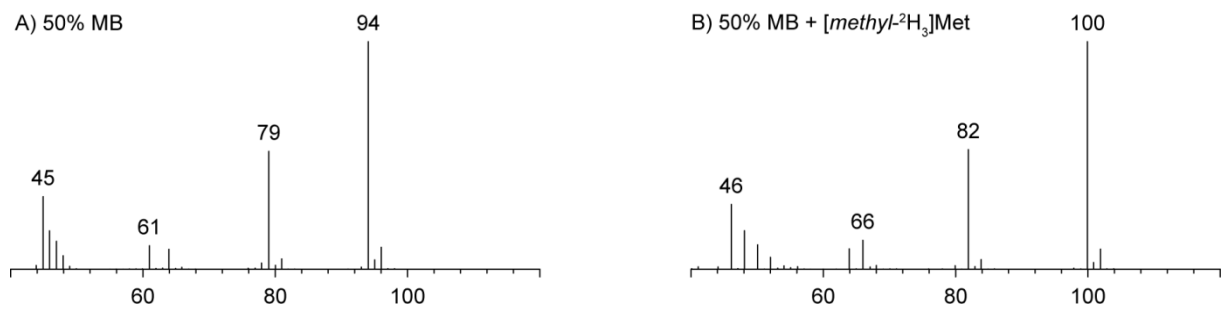

**Figure S1:** Incorporation of  $[methyl-^2H_3]$ methionine into dimethyl disulfide (1) by *Phaeobacter gallaeciensis*.

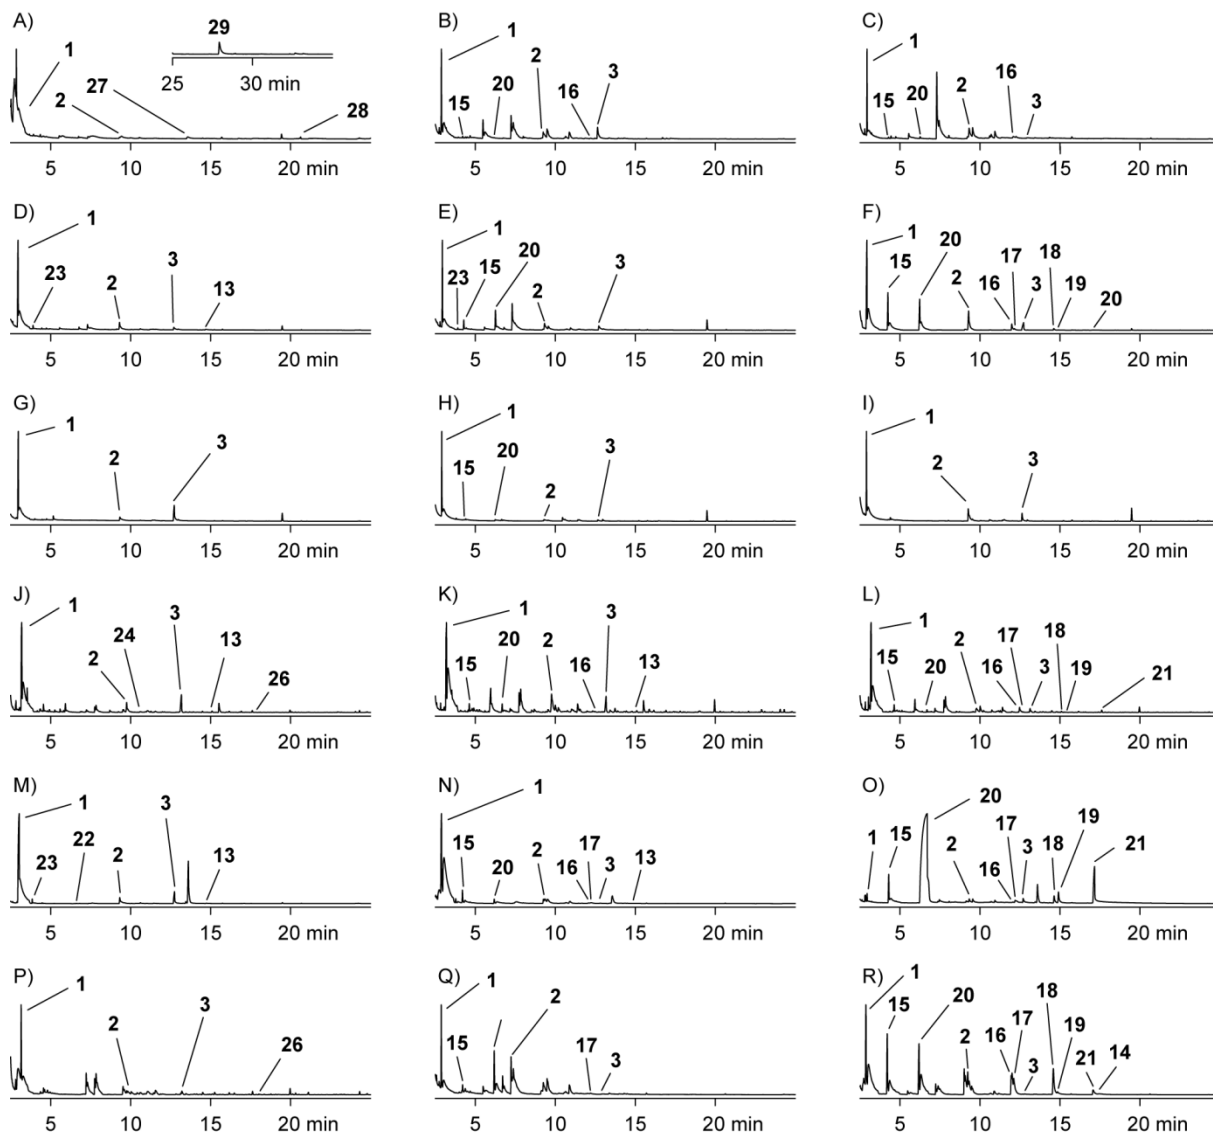

**Figure S2:** Chromatograms of headspace extracts from *R. denitrificans* DSM 7001 grown on A) 50% MB2216, B) 50% MB2216 + 1 mmol/l  $\text{Na}_2\text{SeO}_4$ , C) 50% MB2216 + 1 mmol/l  $\text{Na}_2\text{SeO}_3$ , from *O. indolifex* DSM 14862 grown on D) 50% MB2216, E) 50% MB2216 + 1 mmol/l  $\text{Na}_2\text{SeO}_4$ , F) 50% MB2216 + 1 mmol/l  $\text{Na}_2\text{SeO}_3$ , from *D. shibae* DSM 16493 grown on G) 50% MB2216, H) 50% MB2216 + 1 mmol/l  $\text{Na}_2\text{SeO}_4$ , I) 50% MB2216 + 1 mmol/l  $\text{Na}_2\text{SeO}_3$ , from *L. alexandrii* DFL-11 grown on J) 50% MB2216, K) 50% MB2216 + 1 mmol/l  $\text{Na}_2\text{SeO}_4$ , L) 50% MB2216 + 1 mmol/l  $\text{Na}_2\text{SeO}_3$ , from *H. phototrophica* DFL-43 grown on M) 50% MB2216, N) 50% MB2216 + 1 mmol/l  $\text{Na}_2\text{SeO}_4$ , O) 50% MB2216 + 1 mmol/l  $\text{Na}_2\text{SeO}_3$ , and from *R. mucosus* DFL-24 grown on P) 50% MB2216, Q) 50% MB2216 + 1 mmol/l  $\text{Na}_2\text{SeO}_4$ , R) 50% MB2216 + 1 mmol/l  $\text{Na}_2\text{SeO}_3$ .

**Table S3:** Feeding of selenate and selenite to marine bacteria.

| Compound <sup>a</sup>              | <i>p</i> | DSM 17395  |                                            |                                            | DSM 7001   |                                            |                                            | DSM 14862  |                                            |                                            | DSM 16493  |                                            |                                            | DFL-11     |                                            |                                            | DFL-43     |                                            |                                            | DFL-24     |                                            |                                            |
|------------------------------------|----------|------------|--------------------------------------------|--------------------------------------------|------------|--------------------------------------------|--------------------------------------------|------------|--------------------------------------------|--------------------------------------------|------------|--------------------------------------------|--------------------------------------------|------------|--------------------------------------------|--------------------------------------------|------------|--------------------------------------------|--------------------------------------------|------------|--------------------------------------------|--------------------------------------------|
|                                    |          | 50% MB2216 | +1 mmol/l Na <sub>2</sub> SeO <sub>4</sub> | +1 mmol/l Na <sub>2</sub> SeO <sub>3</sub> | 50% MB2216 | +1 mmol/l Na <sub>2</sub> SeO <sub>4</sub> | +1 mmol/l Na <sub>2</sub> SeO <sub>3</sub> | 50% MB2216 | +1 mmol/l Na <sub>2</sub> SeO <sub>4</sub> | +1 mmol/l Na <sub>2</sub> SeO <sub>3</sub> | 50% MB2216 | +1 mmol/l Na <sub>2</sub> SeO <sub>4</sub> | +1 mmol/l Na <sub>2</sub> SeO <sub>3</sub> | 50% MB2216 | +1 mmol/l Na <sub>2</sub> SeO <sub>4</sub> | +1 mmol/l Na <sub>2</sub> SeO <sub>3</sub> | 50% MB2216 | +1 mmol/l Na <sub>2</sub> SeO <sub>4</sub> | +1 mmol/l Na <sub>2</sub> SeO <sub>3</sub> | 50% MB2216 | +1 mmol/l Na <sub>2</sub> SeO <sub>4</sub> | +1 mmol/l Na <sub>2</sub> SeO <sub>3</sub> |
| Dimethyl disulfide (1)             | 768      | xxx        | xxx                                        | xxx                                        | xxx        | xxx                                        | xxx                                        | xxx        | xx                                         | xxx                                        | xxx        | xxx                                        | xxx                                        | xxx        | xxx                                        | xxx                                        | xxx        | x                                          | xxx                                        | xxx        | xxx                                        |                                            |
| S-Methyl propanethioate (23)       | 802      |            |                                            |                                            |            |                                            | x                                          | x          |                                            |                                            |            |                                            |                                            |            |                                            | x                                          |            |                                            |                                            |            |                                            |                                            |
| Dimethyl selenyl sulfide (15)      | 814      |            | xxx                                        | xxx                                        |            | x                                          | x                                          |            | x                                          | xxx                                        |            | x                                          |                                            | x          | x                                          |                                            | xx         | xx                                         |                                            | xx         | xxx                                        |                                            |
| Methylpyrazine                     | 825      |            |                                            |                                            | x          | x                                          | x                                          |            |                                            |                                            |            |                                            | x                                          | x          | x                                          | x                                          |            |                                            |                                            | x          |                                            |                                            |
| 2-(Methoxymethyl)furan             | 827      |            |                                            |                                            |            | x                                          | x                                          |            |                                            |                                            |            |                                            |                                            | x          | x                                          |                                            | x          | x                                          |                                            | x          | x                                          |                                            |
| Furfural                           | 835      |            |                                            |                                            |            | x                                          |                                            |            |                                            |                                            |            |                                            | x                                          | x          | x                                          |                                            |            |                                            |                                            |            |                                            |                                            |
| 2-Furanmethanol                    | 860      |            | xx                                         |                                            | xx         | xxx                                        | xx                                         |            |                                            |                                            |            |                                            | xx                                         | xx         | xx                                         |                                            |            |                                            |                                            | xx         | x                                          |                                            |
| Dimethyl diselenide (20)           | 884      |            | xx                                         | xx                                         |            | x                                          | x                                          |            | xx                                         | xxx                                        |            | xx                                         |                                            | x          | x                                          |                                            | xx         | xxx                                        |                                            | xxx        | xxx                                        |                                            |
| Bis(methylthio)methane (22)        | 885      |            |                                            |                                            |            |                                            |                                            |            |                                            |                                            |            |                                            |                                            |            |                                            | x                                          |            |                                            |                                            |            |                                            |                                            |
| Cyclohexanone                      | 896      |            |                                            |                                            | x          | x                                          |                                            |            |                                            |                                            |            |                                            | x                                          | x          |                                            | x                                          | x          |                                            | xxx                                        | xxx        | x                                          |                                            |
| 2,5-Dimethylpyrazine               | 911      |            | xxx                                        |                                            | xx         | xxx                                        | xxx                                        |            |                                            |                                            |            |                                            | x                                          | x          | x                                          | x                                          | x          | x                                          | xx                                         | xx         | xx                                         |                                            |
| 2-Acetylfuran                      | 913      |            |                                            |                                            | xx         | xxx                                        | xx                                         |            |                                            |                                            |            |                                            | xx                                         | xx         | xx                                         | x                                          | xx         | x                                          | xxx                                        | xxx        | xx                                         |                                            |
| Benzaldehyde                       | 961      |            |                                            |                                            |            | x                                          | x                                          |            |                                            | x                                          |            |                                            | x                                          |            | x                                          |                                            |            | x                                          | xx                                         | x          | xx                                         |                                            |
| Dimethyl trisulfide (2)            | 967      | x          | xx                                         | xxx                                        | xx         | xx                                         | xx                                         | xx         | x                                          | xxx                                        | xx         | xx                                         | xxx                                        | xx         | xx                                         | xx                                         | xx         | xx                                         | x                                          | xx         | xx                                         | xx                                         |
| 4-Methylthio-2-butanone (24)       | 990      |            |                                            |                                            |            |                                            |                                            |            |                                            |                                            |            |                                            | x                                          |            |                                            |                                            |            |                                            |                                            |            |                                            |                                            |
| 2-Acetylthiazole                   | 1016     |            |                                            |                                            |            | x                                          | x                                          |            |                                            |                                            |            |                                            | x                                          | x          | x                                          | x                                          | x          |                                            | xx                                         | x          | x                                          |                                            |
| Benzyl alcohol                     | 1033     |            |                                            |                                            |            |                                            |                                            |            |                                            |                                            |            |                                            | x                                          | x          | x                                          |                                            |            |                                            |                                            |            |                                            |                                            |
| Bis(methylthio)selenide (16)       | 1045     |            | x                                          | x                                          |            | x                                          | x                                          |            |                                            | xx                                         |            |                                            | x                                          | x          |                                            | x                                          | x          |                                            |                                            |            | xx                                         |                                            |
| Methyl methylseleno disulfide (17) | 1051     |            | x                                          | x                                          |            |                                            |                                            |            |                                            | xx                                         |            |                                            | x                                          |            | x                                          |                                            | x          | x                                          |                                            | x          | xx                                         |                                            |
| S-Methyl methanethiosulfonate (3)  | 1063     | xx         | xx                                         | x                                          |            | xx                                         | x                                          | xx         | xx                                         | x                                          | xx         | xx                                         | xx                                         | xx         | x                                          | xx                                         | x          | x                                          | x                                          | x          | x                                          |                                            |
| Acetophenone                       | 1065     |            |                                            |                                            |            |                                            |                                            |            |                                            |                                            |            |                                            |                                            |            | x                                          |                                            |            |                                            | x                                          |            |                                            |                                            |
| 1,2,4-Trithiolane (27)             | 1088     |            |                                            |                                            | x          |                                            |                                            |            |                                            |                                            |            |                                            |                                            |            |                                            |                                            |            |                                            |                                            |            |                                            |                                            |
| 1-Undecene                         | 1091     |            |                                            |                                            |            |                                            |                                            |            |                                            |                                            |            |                                            |                                            |            |                                            | xxx                                        | xx         | xx                                         |                                            |            |                                            |                                            |
| Methyl benzoate                    | 1093     |            |                                            |                                            |            |                                            |                                            |            |                                            |                                            |            |                                            | x                                          |            |                                            |                                            |            |                                            |                                            |            |                                            |                                            |
| Nonanal                            | 1103     |            |                                            |                                            |            | x                                          |                                            |            |                                            |                                            |            |                                            | x                                          |            | x                                          |                                            |            |                                            | x                                          |            | x                                          |                                            |
| 2-Phenylethanol                    | 1111     |            |                                            |                                            |            |                                            |                                            |            |                                            |                                            |            |                                            | x                                          | x          | x                                          |                                            |            |                                            |                                            |            |                                            |                                            |
| Methyl methylthio diselenide (18)  | 1119     |            | x                                          |                                            |            |                                            |                                            |            |                                            | x                                          |            |                                            |                                            |            | x                                          |                                            |            | x                                          |                                            |            | xx                                         |                                            |

|                                          |      |    |   |   |     |    |   |    |   |   |   |    |   |   |
|------------------------------------------|------|----|---|---|-----|----|---|----|---|---|---|----|---|---|
| Methyl (methylthio)methyl disulfide (13) | 1123 |    |   |   | x   |    |   | x  | x |   | x | x  |   |   |
| Phenylacetone                            | 1127 |    |   |   |     |    |   | x  |   | x |   |    | x |   |
| Bis(methylseleno)sulfide (19)            | 1127 |    |   |   |     |    | x |    |   | x |   |    | x | x |
| Methyl nicotinate                        | 1137 |    |   |   |     |    |   | xx | x | x |   |    |   |   |
| Ethyl benzoate                           | 1170 | xx | x |   |     | xx | x |    |   |   |   |    |   |   |
| Dimethyl triselenide (21)                | 1203 |    |   |   |     |    |   |    |   | x |   | xx |   | x |
| Decanal                                  | 1203 |    |   | x | x   |    |   | x  |   | x |   |    | x |   |
| Dimethyl tetrasulfide (14)               | 1213 |    | x |   |     |    |   |    |   |   |   |    |   | x |
| Benzothiazol (26)                        | 1220 |    |   |   |     |    |   | x  |   |   |   |    | x |   |
| Ethyl phenylacetate                      | 1244 |    |   |   |     |    |   |    |   | x |   |    | x |   |
| 1,2,4,5-Tetrathiane (28)                 | 1350 |    |   |   | x   |    |   |    |   |   |   |    |   |   |
| Lenthionine (29)                         | 1624 |    |   |   | xxx |    |   |    |   |   |   |    |   |   |

<sup>a</sup> Known contaminants such as plasticizers and compounds arising from the agar medium are not mentioned. Relative amounts of compounds were given as follows: x: 0-2%, xx: 2-8%, xxx: >8% of total area in GC. <sup>b</sup> Linear retention index on a HP-5MS fused silicic capillary GC column determined from a homologous series of *n*-alkanes.

## References

1. Thole, S.; Kalhoefer, D.; Voget, S.; Berger, M.; Engelhardt, T.; Liesegang, H.; Wollherr, A.; Kjelleberg, S.; Daniel, R.; Simon, M.; Thomas, T.; Brinkhoff, T. *ISME J.* **2012**, *6*, 2229–2244.
2. Petersen, J.; Brinkmann, H.; Berger, M.; Brinkhoff, T.; Päucker, O.; Pradella, S. *Mol Biol Evol.* **2011**, *28*, 1229–1240.
3. González, J. M.; Covert, J. S.; Whitman, W. B.; Henriksen, J. R.; Mayer, F.; Scharf, B.; Schmitt, R.; Buchan, A.; Fuhrman, J. A.; Keine, R. P.; Moran, M. A. *Int. J. Syst. Evol. Microbiol.* **2003**, *53*, 1261–1269.
4. Todd, J. D.; Curson, A. R. J.; Sullivan, M. J.; Kirkwood, M.; Johnston, A. W. B. *PLOS ONE* **2012**, *7*, e35947.
5. Todd, J. D.; Curson, A. R. J.; Kirkwood, M.; Sullivan, M. J.; Green, R. T.; Johnston, A. W. B. *Environ. Microbiol.* **2011**, *13*, 427–438.
6. Shiba, T. *Syst. Appl. Microbiol.* **1991**, *14*, 140–145.
7. Wagner-Döbler, I.; Rheims, H.; Felske, A.; El-Ghezal, A.; Flade-Schröder, D.; Laatsch, H.; Lang, S.; Pukall, R.; Tindall, B. J. *Int. J. Syst. Evol. Microbiol.* **2004**, *54*, 1177–1184.
8. Biebl, H.; Allgaier, M.; Tindall, B. J.; Koblizek, M.; Lünsdorf, H.; Pukall, R.; Wagner-Döbler, I. *Int. J. Syst. Evol. Microbiol.* **2005**, *55*, 1089–1096.
9. Biebl, H.; Pukall, R.; Lünsdorf, H.; Schulz S.; Allgaier, M.; Tindal, B. J.; Wagner-Döbler, I. *Int. J. Syst. Evol. Microbiol.* **2007**, *57*, 1095–1107.
10. Biebl, H.; Tindall, B. J.; Lünsdorf, H.; Allgaier, M.; Wagner-Döbler, I. *Int. J. Syst. Evol. Microbiol.* **2006**, *56*, 821–826.
11. Biebl, H.; Allgaier, M.; Lünsdorf, H.; Pukall, R.; Tindall, B. J.; Wagner-Döbler, I. *Int. J. Syst. Evol. Microbiol.* **2005**, *55*, 2377–2383.
